# Supplementary material for: Clinical Resistant Strains of Enterococci and Their Correlation to Reduced Susceptibility to Biocides: Phenotypic and Genotypic Analysis of Macrolides, Lincosamides, and Streptogramins
Source: MDPI journal article supplement (doi:10.3390/antibiotics12030461), 2023-02-24
Supplement: s1 [file s1]

## Supplementary Data

Table S1. MLS susceptibility patterns with number and percentage of isolates

| Pattern | Resistance to antibiotics |     |     |    |   |    |    | <i>E. faecalis</i> |      | <i>E. faecium</i> |      | <i>Other<br/>Enterococci spp</i> |      | Total |      |
|---------|---------------------------|-----|-----|----|---|----|----|--------------------|------|-------------------|------|----------------------------------|------|-------|------|
|         | E                         | AZM | CLR | SP | L | DA | QD | No                 | %    | No                | %    | No                               | %    | No    | %    |
|         |                           |     |     |    |   |    |    |                    |      |                   |      |                                  |      |       |      |
| I       |                           |     |     |    |   |    |    | 12                 | 17.9 | 9                 | 17.3 | 2                                | 16.7 | 23    | 17.6 |
| II      | R                         | R   | R   | R  | R | R  | R  | 24                 | 35.8 | 16                | 30.8 | 4                                | 33.3 | 44    | 33.6 |
| III     | R                         | R   | R   | R  |   |    |    | 5                  | 7.5  | 3                 | 5.8  | 1                                | 8.3  | 9     | 6.9  |
| IV      |                           |     |     |    | R | R  | R  | 1                  | 1.5  | 1                 | 1.9  |                                  |      | 2     | 1.5  |
| V       | R                         |     |     |    |   |    |    | 3                  | 4.5  | 2                 | 3.8  |                                  |      | 5     | 3.8  |
| VI      | R                         | R   |     | R  | R | R  | R  | 1                  | 1.5  | 1                 | 1.9  |                                  |      | 2     | 1.5  |
| VII     | R                         | R   | R   |    | R | R  | R  | 1                  | 1.5  | 1                 | 1.9  | 1                                | 8.3  | 3     | 2.3  |
| VIII    | R                         | R   |     |    | R |    |    | 2                  | 3.0  | 1                 | 1.9  |                                  |      | 3     | 2.3  |
| IX      | R                         |     |     |    | R |    |    | 3                  | 4.5  | 2                 | 3.8  | 1                                | 8.3  | 6     | 4.6  |
| X       | R                         |     |     | R  | R | R  | R  | 1                  | 1.5  | 1                 | 1.9  |                                  |      | 2     | 1.5  |
| XI      | R                         | R   | R   | R  | R |    | R  | 5                  | 7.5  | 7                 | 13.5 | 1                                | 8.3  | 13    | 9.9  |
| XII     | R                         |     |     | R  | R |    |    | 1                  | 1.5  | 1                 | 1.9  |                                  |      | 2     | 1.5  |
| XIII    |                           |     |     |    | R |    |    | 3                  | 4.5  | 3                 | 5.8  | 2                                | 16.7 | 8     | 6.1  |
| XIV     | R                         |     |     |    | R | R  |    | 3                  | 4.5  | 2                 | 3.8  |                                  |      | 5     | 3.8  |
| XV      |                           |     | R   |    | R |    |    | 1                  | 1.5  | 1                 | 1.9  |                                  |      | 2     | 1.5  |
| XVI     | R                         | R   | R   |    | R |    |    | 1                  | 1.5  | 1                 | 1.9  |                                  |      | 2     | 1.5  |

\*R= Resistant; Antibiotics: E= Erythromycin, AZM= Azithromycin, CLR= Clarithromycin, SP= Spiramycin, L= Lincomycin, DA= Clindamycin, and QD= Quinupristin/Dalfopristin.

Table S2. The distribution MLS resistance genes among the resistant phenotypes with numbers and percentages

| Pattern         | Resistance gene profile |             |             |             |             |             |             |             |             | <i>E. faecalis</i> | <i>E. faecium</i> | Other<br><i>Enterococci</i> | Resistance<br>phenotype | Total<br>No. (%) |
|-----------------|-------------------------|-------------|-------------|-------------|-------------|-------------|-------------|-------------|-------------|--------------------|-------------------|-----------------------------|-------------------------|------------------|
|                 | <i>ermA</i>             | <i>ermB</i> | <i>ermC</i> | <i>msrA</i> | <i>mefA</i> | <i>mefE</i> | <i>ereA</i> | <i>lnuA</i> | <i>mphC</i> |                    |                   |                             |                         |                  |
| I               | +                       | +           | +           | -           | -           | -           | -           | -           | -           | 3                  | 2                 |                             | cMLS                    | 5 (4.6%)         |
| I <sub>1</sub>  | +                       | +           | +           | -           | -           | -           | +           | -           | -           | 1                  |                   |                             | cMLS                    | 1 (0.9%)         |
| II              | +                       | +           | -           | -           | -           | -           | -           | -           | -           | 2                  |                   |                             | cMLS                    | 2 (1.9%)         |
| II <sub>1</sub> | +                       | +           | -           | -           | +           | +           | +           | -           | -           | 13                 | 11                | 3                           | cMLS                    | 27 (25%)         |
| II <sub>2</sub> | +                       | +           | -           | -           | -           | -           | -           | +           | -           | 1                  |                   |                             | cMLS                    | 1 (0.9%)         |
| II <sub>3</sub> | +                       | +           | -           | -           | -           | -           | -           | -           | +           | 2                  | 1                 | 1                           | cMLS                    | 4 (3.7%)         |
| II <sub>4</sub> | +                       | +           | -           | -           | -           | -           | +           | -           | +           | 1                  | 5                 | 1                           | cMLS                    | 7 (6.5%)         |
| III             | -                       | +           | +           | -           | -           | -           | +           | -           | -           | 1                  | 1                 |                             | iMLS                    | 2 (1.9%)         |
| II-a            | +                       | +           | -           | -           | -           | -           | -           | -           | -           | 1                  |                   | 1                           | iMLS                    | 2 (1.9%)         |
| V               | -                       | +           | -           | -           | -           | -           | -           | -           | -           | 5                  | 5                 | 1                           | cMLS                    | 11 (10.2%)       |
| V <sub>1</sub>  | -                       | +           | -           | +           | -           | -           | -           | -           | -           | 1                  | 1                 |                             | M                       | 2 (1.9%)         |
| V <sub>11</sub> | -                       | +           | -           | +           | -           | +           | -           | -           | -           | 1                  | 1                 |                             | M                       | 2 (1.9%)         |
| V <sub>12</sub> | -                       | +           | -           | +           | +           | -           | -           | -           | -           | 1                  |                   |                             | M                       | 1 (0.9%)         |
| V <sub>13</sub> | -                       | +           | -           | +           | +           | +           | -           | -           | -           | 1                  | 1                 |                             | M                       | 2 (1.9%)         |
| V <sub>14</sub> | -                       | +           | -           | +           | +           | +           | -           | -           | +           | 1                  | 1                 |                             | M                       | 2 (1.9%)         |
| V <sub>2</sub>  | -                       | +           | -           | -           | +           | +           | +           | -           | -           | 12                 | 9                 | 1                           | cMLS                    | 22 (20.4%)       |
| V <sub>21</sub> | -                       | +           | -           | -           | -           | -           | +           | -           | +           | 1                  | 1                 |                             | cMLS                    | 2 (1.9%)         |
| V <sub>3</sub>  | -                       | +           | -           | -           | +           | +           | +           | -           | -           | 1                  |                   |                             | cMLS                    | 1 (0.9%)         |
| V <sub>31</sub> | -                       | +           | -           | -           | +           | +           | -           | -           | -           | 5                  | 3                 | 1                           | M                       | 9 (8.3%)         |
| VI <sub>1</sub> | -                       | -           | -           | -           | -           | -           | +           | -           | -           |                    | 1                 |                             | L                       | 1 (0.9%)         |
| VI <sub>2</sub> | -                       | -           | -           | -           | -           | -           | +           | +           | -           | 1                  |                   |                             | L                       | 1 (0.9%)         |
| VII             | -                       | -           | -           | -           | +           | +           | -           | -           | -           |                    |                   | 1                           | M                       | 1 (0.9%)         |

Table S3. MIC range, MIC<sub>50</sub>, and MIC<sub>90</sub> to MLS antibiotics

| Antibiotic                    | <i>E. faecalis</i> |                   |                   | <i>E. faecium</i> |                   |                   | Other <i>Enterococci</i> spp |                   |                   |
|-------------------------------|--------------------|-------------------|-------------------|-------------------|-------------------|-------------------|------------------------------|-------------------|-------------------|
|                               | MIC range (µg/ml)  | MIC <sub>50</sub> | MIC <sub>90</sub> | MIC range (µg/ml) | MIC <sub>50</sub> | MIC <sub>90</sub> | MIC range (µg/ml)            | MIC <sub>50</sub> | MIC <sub>90</sub> |
| Erythromycin                  | 0.125 - 1024       | 8                 | 614.4.            | 0.125 - 1024      | 8                 | 870.4             | 0.125 - 1024                 | 6                 | 435.2             |
| Azithromycin                  | 0.125 - 1024       | 8                 | 512               | 0.125 - 1024      | 12                | 512               | 0.125 - 512                  | 4                 | 396.8             |
| Clarithromycin                | 0.125 - 1024       | 1                 | 614.4             | 0.125 - 1024      | 0.5               | 437.9             | 0.125 - 512                  | 0.75              | 217.6             |
| Spiramycin                    | 0.125 - 1024       | 1                 | 512               | 0.125 - 1024      | 0.5               | 512               | 0.125 - 265                  | 0.375             | 217.6             |
| Lincomycin                    | 0.125 - 1024       | 16                | 512               | 0.125 - 1024      | 16                | 870.4             | 0.125 - 512                  | 12                | 435.2             |
| Clindamycin                   | 0.125 - 1024       | 8                 | 614.4.            | 0.125 - 1024      | 8                 | 512               | 0.125 - 1024                 | 6                 | 870.4             |
| Quinupristin/<br>Dalfopristin | 0.125 - 1024       | 4                 | 314.4.            | 0.125 - 1024      | 4                 | 256               | 0.125 - 256                  | 3                 | 256               |

Table S4. MIC range, MIC<sub>50</sub>, and MIC<sub>90</sub> to biocides

| Biocides        | <i>E. faecalis</i> |                   |                   | <i>E. faecium</i> |                   |                   | Other <i>Enterococci</i> spp |                   |                   |
|-----------------|--------------------|-------------------|-------------------|-------------------|-------------------|-------------------|------------------------------|-------------------|-------------------|
|                 | MIC range (µg/ml)  | MIC <sub>50</sub> | MIC <sub>90</sub> | MIC range (µg/ml) | MIC <sub>50</sub> | MIC <sub>90</sub> | MIC range (µg/ml)            | MIC <sub>50</sub> | MIC <sub>90</sub> |
| Triclosan       | 0.4 - 7.0          | 2.0               | 5.5               | 0.1 - 6.0         | 2.0               | 4.8               | 0.5 – 6.0                    | 2.2               | 5.4               |
| Cetrimide       | 0.6 – 3.0          | 1.4               | 2.68              | 0.5 - 10.0        | 3.4               | 5.7               | 0.5 – 5.0                    | 1.45              | 3.6               |
| Glutaraldehyde  | 0.5 - 1.8          | 0.75              | 1.45              | 0.1 - 0.9         | 0.65              | 0.88              | 0.2 - 0.9                    | 0.43              | 0.8               |
| Thiomersal      | 0.2 - 3            | 0.7               | 2.6               | 0.8 - 6.4         | 1.8               | 5                 | 0.5 - 3                      | 1.3               | 2.6               |
| Chlorocresol    | 200 - 600          | 280               | 560               | 150 - 500         | 260               | 480               | 150 - 600                    | 280               | 570               |
| Povidone-iodine | 4200-5600          | 5000              | 5500              | 4100-5600         | 4800              | 5300              | 900-1500                     | 1050              | 1400              |
